1 **Fertility of Pedicellate Spikelets in Sorghum is Controlled by a Jasmonic Acid Regulatory**  
2 **Module**

3 Nicholas Gladman<sup>1,2</sup>, Yinping Jiao<sup>1,2</sup>, Young Koung Lee<sup>2,3</sup>, Lifang Zhang<sup>2</sup>, Ratan Chopra<sup>1,4</sup>,  
4 Michael Regulski<sup>2</sup>, Gloria Burow<sup>1</sup>, Chad Hayes<sup>1</sup>, Shawn A. Christensen<sup>5</sup>, Lavanya  
5 Dampanaboina<sup>1</sup>, Junping Chen<sup>1</sup>, John Burke<sup>1</sup>, Doreen Ware<sup>2,6\*</sup>, & Zhanguo Xin<sup>1\*</sup>.

6  
7 1. Plant Stress and Germplasm Development Unit, Cropping Systems Research Laboratory, U.S.  
8 Department of Agriculture-Agricultural Research Service, Lubbock, Texas 79415.

9 2. Cold Spring Harbor Laboratory, Cold Spring Harbor, New York 11724.

10 3. Plasma Technology Research Center, National Fusion Research Institute, 37, Dongjangan-  
11 ro, Gunsan-si, Jeollabuk-do, 54004, Republic of Korea.

12 4. Current address: Department of Agronomy and Plant Genetics, University of Minnesota, St.  
13 Paul, MN 55108.

14 5. Chemistry Research Unit, USDA-ARS, 1700 S.W. 23RD DRIVE, Gainesville, FL 32608.

15 6. U.S. Department of Agriculture-Agricultural Research Service, NEA Robert W. Holley Center  
16 for Agriculture and Health, Cornell University, Ithaca, New York 14853.

17 \*Corresponding authors: Doreen Ware ([ware@cshl.edu](mailto:ware@cshl.edu) or [Doreen.Ware@ARS.USDA.GOV](mailto:Doreen.Ware@ARS.USDA.GOV)) and  
18 Zhanguo Xin ([Zhanguo.Xin@ARS.USDA.GOV](mailto:Zhanguo.Xin@ARS.USDA.GOV)).

19

20 **Abstract**

21  
22 **As in other cereal crops, the panicles of sorghum (*Sorghum bicolor* (L.) Moench) comprise**  
23 **two types of floral spikelets (grass flowers). Only sessile spikelets (SSs) are capable of**  
24 **producing viable grains, whereas pedicellate spikelets (PSs) cease development after**  
25 **initiation and eventually abort. Consequently, grain number per panicle (GNP) is lower than**  
26 **the total number of flowers produced per panicle. The mechanism underlying this**  
27 **differential fertility is not well understood. To investigate this issue, we isolated a series of**  
28 **EMS-induced *multiseeded* (*msd*) mutants that result in full spikelet fertility, effectively**  
29 **doubling GNP. Previously, we showed that MSD1 is a TCP (Teosinte**  
30 **branched/Cycloidea/PCF) transcription factor that regulates jasmonic acid (JA)**  
31 **biosynthesis, and ultimately floral sex organ development. Here, we show that *MSD2***  
32 **encodes a lipoxygenase (LOX) that catalyzes the first committed step of JA biosynthesis.**  
33 **Further, we demonstrate that MSD1 binds to the promoters of *MSD2* and other JA pathway**  
34 **genes. Together, these results show that a JA-induced module regulates sorghum panicle**  
35 **development and spikelet fertility. The findings advance our understanding of**  
36 **inflorescence development and could lead to new strategies for increasing GNP and grain**  
37 **yield in sorghum and other cereal crops.**

38  
39 **Keywords:** Transcriptional Regulators, Plant Development, JA Signaling, Gene Expression  
40

## 41 **Significance**

42  
43 Through a single base pair mutation, grain number can be increased by ~200% in the globally  
44 important crop *Sorghum bicolor*. This mutation affects the expression of an enzyme, MSD2, that  
45 catalyzes the jasmonic acid pathway in developing floral meristems. The global gene expression  
46 profile in this enzymatic mutant is similar to that of a transcription factor mutant, *msd1*, indicating  
47 that disturbing any component of this regulatory module disrupts a positive feedback loop that  
48 occurs normally due to regular developmental perception of jasmonic acid. Additionally, the MSD1  
49 transcription factor is able to regulate *MSD2* in addition to other jasmonic acid pathway genes,  
50 suggesting that it is a primary transcriptional regulator of this hormone signaling pathway in floral  
51 meristems.

## 52 53 **Introduction**

54  
55 Sorghum [*Sorghum bicolor*(1) (L.) Moench] is a crop plant domesticated in northern Africa  
56 ~6000 years ago(1, 2). A C<sub>4</sub> grass with robust tolerance to drought, heat, and high-salt conditions,  
57 sorghum is the fifth most agriculturally important crop in terms of global dedicated acreage and  
58 production quantity. It also serves as a useful model for crop research due to its completely  
59 sequenced compact genome (~730 Mb)(3) and similarity to the functional genomics capabilities  
60 of maize, sugarcane, and other bioenergy grasses comprising more convoluted genomes.

61 Increasing grain yield has always been a high priority for breeders. Increasing grains per  
62 panicle (GNP) and optimizing panicle architecture represent feasible goals for modern gene  
63 editing in sorghum(4, 5). GNP and seed head architecture are related traits, with origins in early  
64 stages of inflorescence development(6, 7). Sorghum forms a determinate panicle that manifests  
65 at the end of the shoot meristem, with nodes regularly extending throughout from which secondary  
66 and tertiary branches emanate(8). A terminal trio of spikelet florets are attached through a pedicel  
67 to these branches: one sessile spikelet (SS) that is fertile and two pedicellate spikelets (PSs) that  
68 fail to generate mature pistils and sometimes anthers, this results in an inability of PSs to fertilize  
69 and will ultimately senesce during grain filling instead of becoming viable seed(6). Below this  
70 terminal spikelet group, several pairs of SSs and PSs populate the branches down to the nodes.

71 Jasmonic acid (JA) is a plant hormone derived from  $\alpha$ -linolenic acid and shares structural  
72 similarities to animal prostaglandins(9, 10). JA plays roles in organ development, as well as biotic  
73 and abiotic response signaling mechanisms(7, 11-14), spikelet formation in rice(15), and sex  
74 determination in maize(13, 16, 17). In sorghum, the TCP family transcription factor MSD1

75 (*multiseeded 1*) controls PS fertility(7). MSD1 is expressed in a narrow spatiotemporal window  
76 within the developing panicle in wild type (WT), BTx623; its expression is dramatically reduced in  
77 EMS-induced *msd1* mutants. Many genes involved in JA biosynthesis, including 12-  
78 oxophytodeinoate reductase 3 (*OPR3*)(18, 19), allene oxide synthase (*AOS*)(20), cytochrome  
79 P450(21, 22), and lipoxygenase (*LOX*)(23), are also downregulated in *msd1* mutants. MSD1 is  
80 thought to activate the programmed cell death pathway through activation of JA biosynthesis,  
81 which destines the PS to abortion.

82 In this study, we characterized another *msd* mutant, *msd2*, from the same publicly  
83 available sorghum EMS population in which *msd1* was identified(24). *MSD2* encodes a 13-  
84 lipoxygenase that catalyzes the conversion of free  $\alpha$ -linolenic acid (18:3) to 13(S)-  
85 hydroperoxylinolenic acid (13-Hpot), the first committed step of the JA biosynthetic pathway(11,  
86 25). As with *msd1*, mutants in *msd2* exhibit complete spikelet fertility for both SSs and PSs,  
87 resulting in seed formation from both flower types. Multiple independent alleles were discovered  
88 for *msd2*, including nonsense and missense mutations within the LOX functional domain. Mutants  
89 in *msd1* and *msd2* exhibit similar regulatory network profiles, including downregulation of JA  
90 pathway genes and other expression cascades related to developmental and cellular  
91 restructuring. Finally, MSD1 is capable of activating *MSD2* expression, as well as regulating other  
92 gene networks *in trans*, leading to the *multiseeded* phenotype. Taken together, our findings  
93 demonstrate that MSD2, along with MSD1, modulates the JA pathway during sorghum sex organ  
94 development.

95

## 96 **Results**

97

### 98 *MSD2* Encodes a Lipoxygenase in the Jasmonic Acid Biosynthetic Pathway

99 *Sorghum bicolor* (L.) Moench plants manifesting the *multiseeded* phenotype were  
100 identified from a collection of EMS-induced single nucleotide polymorphisms (SNP)(24). *MSD1*,  
101 which encodes a TCP [*Teosinte branched 1* (*TB1*), *Cycloidea* (*Cyc*), and *Proliferating Cell nuclear*  
102 *antigen binding Factor* (*PFC*)](26-28) transcription factor, was the first to be characterized,  
103 revealing a role in controlling bioactive JA levels in developing floral meristems(7). To identify  
104 additional causative alleles, we subjected seventeen independent *msd* mutants to whole-genome  
105 sequencing. Three of these independent alleles, *msd2-1*, *-2*, and *-3*, localized to  
106 SORBI\_3006G095600 (Sb06g018040)(7), which encodes a class II 13-lipoxygenase that shares  
107 >95% amino acid identity with the maize *tasselseed 1* (*TS1*) gene(16). SORBI\_3006G095600 is  
108 syntenic to *TS1* and is the closest related maize orthologue based on a maximum likelihood

109 phylogenetic analysis (**Supplemental Figure 1**). The *msd2-1* mutant harbors a nonsense  
110 mutation (peptide residue Q402\*) and *msd2-2* a missense mutation (peptide residue A423V),  
111 respectively, within the lipoxygenase (LOX) domain (**Figure 1a**). The *msd2-3* allele contains the  
112 same mutation as *msd2-1*, but the lines are not siblings, as evidenced by the lack of other shared  
113 SNPs.

114 Lipoxygenases catalyze linolenic acid to hydroperoxyoctadecadienoic acid in the initial  
115 committed step of the JA biosynthetic pathway(11). There are 12 LOX paralogs in *Sorghum*  
116 *bicolor* (**Figure 1b**), which exhibit different patterns of tissue-specific expression in WT BTx623  
117 plants. *MSD2* is expressed at lower levels overall than other LOX genes(29-32), but is more  
118 strongly expressed in developing panicles than its 13-LOX paralogs SORBI\_3007g210400 and  
119 SORBI\_3001G483400 (**Figure 1c**); only SORBI\_3004G078600 is more strongly expressed at  
120 particular stages. Thus, like *MSD1*, *MSD2* operates under low levels of expression in specific  
121 tissues within developing meristems. EMS-induced SNP mutant lines exist for the other 13-LOX  
122 paralogs (**Supplemental Table 1**), including a nonsense mutation in the more highly expressed  
123 SORBI\_3004G078600, but no *multiseeded* phenotype has been observed in any of these lines.  
124 This suggests that *MSD2* is a specific and necessary LOX isoform involved in the JA pathway,  
125 which controls floral organ progression.

126 *MSD2* mutants display the same floral phenotype as *msd1*: complete development of  
127 anthers and ovaries in both PSs and SSs. Electron micrographs of developing floral spikelets  
128 revealed that the developmental pattern of *msd2* is similar to that of WT(7) (**Figure 1d**), but like  
129 *msd1*, the end result is complete floral fertility of all spikelets with near 100% grain filling,  
130 increasing the GNP of the mutant (**Figure 1e**), although the *msd2* seeds are smaller than those  
131 of WT. Dissected images of PSs also show that *msd2* has the same full pistil development  
132 phenotype as *msd1* in contrast to WT PSs that lack a mature gynoeceium (**Supplemental Figure**  
133 **1**). The only other consistent agronomic difference between *msd2* and WT plants was a slight  
134 increase in initial root growth rate in the mutant (**Supplemental Figure 1**).

135

### 136 The *msd2* Phenotype is Rescued by Exogenous Methyl-JA Treatment

137 To determine whether exogenous application of JA could rescue the *msd2* phenotype, as  
138 it does in *msd1* mutants, we pipetted 1 mM methyl-JA (Me-JA) directly down the whorls of young  
139 WT and *msd2* mutant plants. This chemical treatment restored PS infertility (**Figure 2**). Panicle  
140 size was reduced in Me-JA treated plants, as was branch length and number. Panicle emergence  
141 was also delayed in all genotypes relative to untreated or negative control plants, likely due to

142 other developmental signaling effects and inhibition of cell expansion caused by the introduction  
143 of exogenous jasmonates(33, 34).

144

#### 145 MSD2 Regulatory Networks Are Similar to MSD1

146 Transcriptomic data indicated that many JA biosynthetic pathway genes, including all *LOX*  
147 paralogs, were coordinately downregulated in stage 4 SS and PS tissues of developing *msd2*  
148 panicles (**Figure 3a, b**). Within these tissues, the global transcriptomic profile of genes  
149 downregulated in *msd2* revealed Gene Ontology (GO) term enrichment for proteins involved in  
150 oxylipin biosynthesis, as well as reorganization of cellular structure (**Supplemental Figure 2**),  
151 including members of the glycoside hydrolase, lipid transferase, and cellulose synthase families.  
152 Genes upregulated within stage 4 PS and SS tissues of *msd2* were enriched for functions related  
153 to system development, an ontological group consisting of transcription factors involved in  
154 developmental signaling and progression (**Supplemental Figure 3**).

155 Comparison of *msd1* and *msd2* transcriptomes revealed conserved GO enrichment  
156 categories, with little difference in expression of JA biosynthetic and signaling genes between  
157 mutants in the TCP transcription factor and lipoxygenase components of the hormone pathway.  
158 Principal component analysis (PCA) of JA pathway gene expression in both *msd1* and *msd2*  
159 showed that the greatest variance involved particular JA biosynthesis genes, predominantly  
160 cytochrome, jasmonate methyl transferases, *OPC-8*, *OPR*, and *LOX* genes (**Figure 3c**). Early-  
161 stage meristems (stage 1 and stage 3) exhibited the least variance between the *msd1* and *msd2*  
162 transcriptional profiles, whereas stage 4 and 5 inflorescences and spikelets made the greatest  
163 contribution to PCA dimensionality. PCA eigenvectors also indicated that the transcriptional  
164 divergence between WT and *multiseeded* plants occurs around stage 4 and continues through  
165 maturation in stage 5 (**Figure 3d**). A set of 149 genes identified by Jiao *et al.* (2018) as putative  
166 regulatory targets of MSD1 was strongly downregulated in *msd2* in either stage 4 or stage 5  
167 tissues (**Supplemental Figure 4a, b**). Again, dimensional analysis of RNA-seq data revealed little  
168 variation between *msd1* and *msd2*, and indicated that stage 4 meristem marks the moment of  
169 demarcation between *multiseeded* and WT plants (**Supplemental Figure 4d, c**).

170 Motif analysis of JA biosynthetic and signaling genes revealed enrichment for various  
171 developmental and environmentally responsive DNA-binding domains, specifically the AP2, BZR  
172 (brassinazole-resistant family), bZIP, and WRKY families, as well as TCP proteins  
173 (**Supplemental Figure 5a**). A similar analysis of the 149 candidate MSD1 regulatory targets  
174 yielded a significant enrichment for CG-rich motifs strongly recognized by TCP, AP2, MYB, and  
175 E2F (specifically Della) transcription factors (**Supplemental Figure 5b**).

176

### 177 MSD2 Is Regulated by the TCP Transcription Factor MSD1

178 To evaluate if MSD1 directly regulates components of the JA biosynthetic pathway, Yeast  
179 1-hybrid (Y1H) analysis was performed to determine whether MSD1 directly regulates *MSD2* in  
180 *trans*. Indeed, MSD1 bound to the sequence upstream of the *MSD2* transcriptional start site  
181 (TSS). MSD1 also bound sequence upstream of its own TSS (**Figure 4a**). These observations  
182 are consistent with the idea that MSD1 controls expression of both itself and *MSD2*.

183 In a less biased investigation of MSD1 regulatory targets, we conducted DNA Affinity  
184 Purification sequencing (DAP-seq)(35) analysis using Illumina short-read libraries constructed  
185 from developing floral meristem tissues and incubated with bacterially-expressed GST-tagged  
186 MSD1 proteins. The full list of 2730 identified peaks with their nearest annotated genes is provided  
187 as **Supplementary Table 2**. Motif analysis of peaks localized near TSSs were only enriched for  
188 the canonical TCP DNA binding motif (GTGGGNCC) bound by other plant TCP proteins (**Figure**  
189 **4b**)(35-37). Comparing these peaks with RNA-seq data revealed that 124 of the genes associated  
190 with these peaks were at least 2-fold downregulated in stage 4 PS or SS tissues of *msd1* mutants,  
191 and the size of this candidate gene list increased when we included genes downregulated in any  
192 meristem tissue stage. Based on homology to JA pathway genes from other plant species, a  
193 subset of these downregulated genes is involved in JA biosynthesis or signaling (**Figure 4c**),  
194 including the *LOX* genes SORBI\_3008G157900 and SORBI\_3007G210400. Additionally, several  
195 genes associated with DAP-seq peaks were among the 149 MSD1 regulatory targets identified  
196 by Jiao *et al.* (2018): they are SORBI\_3001G012200 (cytochrome P450), SORBI\_3001G202600  
197 (glutamyl-tRNA reductase), SORBI\_3002G227700 (lipase), SORBI\_3003G061900 (zinc finger),  
198 SORBI\_3007G004600 (ferredoxin-type iron-sulfur binding domain containing protein),  
199 SORBI\_3007G035600 (MSP domain containing protein), SORBI\_3009G032600 (peroxidase),  
200 and SORBI\_3009G100500 (WRKY).

201 The majority of DAP-seq peaks were localized more than 2000 base pairs upstream or  
202 downstream of the nearest annotated gene TSS, suggesting that they represent MSD1-targeted  
203 enhancer regions. When we applied motif analysis to all 2730 peaks, we identified additional DNA  
204 binding sequences. Several of the most significant motifs are recognized by other environmentally  
205 responsive and developmental transcription factors, including AP2, WRKY, HOMEBOX, bZIP,  
206 and MYB (**Figure 4d**). Transcripts downregulated in *msd1* panicles that were also associated with  
207 MSD1 DAP-seq peaks included homologs of developmental signaling gene products, such as  
208 *Ramosa3* and *Embryonic Flower 1*, as well as several WRKY, AP2/ERF, and ZINC-finger  
209 transcription factors.

210

## 211 Discussion

212

213 MSD2 functions as an essential developmental gatekeeper in floral sex organ  
214 development; *MSD2*-deficient plants exhibit 100% flower fertility and grain filling, culminating in  
215 higher GNP. Mutant *msd2* panicles have similar transcriptomic profiles to mutants in the TCP  
216 transcription factor *MSD1*, suggesting that their respective phenotypes are both the result of  
217 disrupting an enzymatically-controlled feedback loop. *MSD1* has the capacity to bind the promoter  
218 of *MSD2*, as well as promoters and more distant genetic elements associated with developmental  
219 and JA pathway genes, including those encoding other LOX-domain containing proteins.

220 JA is integral to environmental responsiveness and developmental progression; regulators  
221 of JA, JA biosynthetic genes, and JA signaling proteins influence pest/pathogen sensitivity(38,  
222 39), wound response(22, 40, 41), cell expansion(33), and sex determination and floral organ  
223 progression (specifically, anther and pistil development)(7, 15-17, 22, 27, 42, 43). Barley, rice,  
224 and maize display complex mechanisms of floral development. These modules have been  
225 genetically dissected via mutant analyses of homeobox, AP2/ERF, and MADS-box transcription  
226 factors as well as JA signaling genes and biosynthetic lipases. Notably, *MSD2* influences pistil  
227 progression in sorghum spikelets and the maize ortholog *TS1* controls pistillate determinacy in  
228 tassels. Molecular interpretation of these regulatory network ensembles reveals that repression  
229 of spikelet fertility in grasses is the norm and is modulated through one or a number of hormonal  
230 pathways in a given Poaceae lineage, which include JA and auxin(15, 44-46).

231 Specifically, the role of *MSD2* in regulating floral organ fertility in sorghum is analogous to  
232 those of other LOX domain-containing proteins from other plant models(11, 16, 17, 25, 47);  
233 multiple paralogs exist and exhibit variable expression through the stages of meristem  
234 development, indicating potential redundancy and narrow spatiotemporal expression of key LOX  
235 genes during development. Despite the higher expression of some LOX paralogs in *msd*  
236 meristems, exogenous Me-JA is sufficient to rescue the *multiseeded* phenotype, indicating that  
237 *msd2* is specifically responsible for sufficient JA signaling in the meristem cells that differentiate  
238 into male and female organs in PS and SS tissues.

239 Furthermore, the *msd2* RNA-seq data reveals the specific JA module of developmental  
240 control within sorghum; the data confirms the previous observation that the lack of a functional  
241 lipid enzyme can dismantle a regulatory network, resulting in observable downregulation of other  
242 biosynthetic pathway genes(10, 48, 49); ablating elements of the JA pathway triggers the  
243 disruption of a positive feedback loop that would otherwise progress normally due to regular



244 developmental perception of JA. In the case of *msd2*, this yielded a transcriptomic profile similar  
245 to that of the TCP transcription factor mutant *msd1* across developmental time points in immature  
246 meristems. Furthermore, protein–protein interaction and GO enrichment analyses of *msd1* and  
247 *msd2* gene networks in developing panicles suggest the existence of a distinct molecular avenue  
248 that leads to elevated GNP by diverting the expression of cellular restructuring genes and  
249 shunting to alternate developmental cascades mediated by other transcription factors and  
250 influenced by other hormone pathways.

251 MSD1 can bind to the *MSD2* promoter and activate gene expression. Consistent with this,  
252 expression analysis also revealed reduced levels of *MSD2* transcript in the *msd1* mutants(7). In  
253 addition, DAP-seq analysis showed that MSD1 associates with other JA biosynthetic and  
254 signaling genes, including both 9- and 13-LOX paralogs of *MSD2*. Additionally, we identified  
255 potential enhancer binding regions for MSD1 that also exhibit enrichment for motifs bound by  
256 other developmental and environmental response transcription factors, suggesting that MSD1  
257 participates in a mixed model of enhancer organization throughout the genome(50). However,  
258 further chromatin conservation and architecture analyses will be required to elucidate the  
259 complete enhancer profile of this and other TCP proteins. It should be noted that although the  
260 sorghum *Ramosa3* ortholog was downregulated, several other trehalose phosphatase genes, in  
261 addition to *Clavata3*, were strongly upregulated in the mutants, suggesting that in *msd* mutants  
262 there is a diverting of the developmental signaling networks that canonically dictate sex organ  
263 determinacy in some plant lineages. The MSD1 DNA-binding data, together with the  
264 transcriptomic overlap of *msd1* and *msd2* mutants, provide further support of a model in which JA  
265 is responsible for regulating floral sex organ fate in *Sorghum bicolor*, and MSD1 is a major  
266 regulator of gene expression in this developmental schema (**Supplemental Figure 6**).

267

## 268 **Materials and Methods**

269

### 270 Identification of *MSD2* and Phenotypic Evaluation

271 Seventeen *msd* mutants were isolated from an ethyl methane sulfonate (EMS)  
272 population(51) and grown in the field of the USDA-ARS Cropping Systems Research Laboratory  
273 at Lubbock, TX (33°39' N, 101°49' W). High-quality DNA was extracted(52) from confirmed *msd*  
274 lines and submitted for whole-genome sequencing at Beijing Genomic Institute  
275 (<https://www.bgi.com/us/>). Reads were trimmed and aligned to the sorghum reference genome  
276 v1.4 with Bowtie2(53). SNP calling was carried out on reads with PHRED >20 using SAMtools(54)  
277 and BCFtools; read depth was set from 3 to 50. Only homozygous G/C to A/T SNP transitions

278 were filtered through to prediction by the Ensembl variation predictor(55). Functional annotations  
279 of genes along with homology and syntenic analyses were derived from the Gramene database  
280 release 39(56). Phylogenetic analysis (boxshade and trees) was performed using MUSCLE  
281 alignment from MEGA X software. Phenotypic observations including grain number per panicle,  
282 root length, and days to emergence were taken from individual plants and seedlings grown in  
283 greenhouse or growth chamber conditions (16h:8h light:dark photoperiod, 27° C).  
284 Photomicrographs of inflorescence tissues at five stages (from meristem to immature spikelets  
285 as described in Jiao *et al.* 2018) were collected and processed for scanning electron microscopy  
286 (SEM).

287

### 288 Transcriptome profiling

289 Sample collection, processing, and transcriptomic profiling was conducted as described  
290 in Jiao *et al.* (2018). Three replicates (ten plants each) at each stage of panicle development were  
291 used for tissue collection. The ten plants for each replicate were processed as follows: at stage  
292 1, whole panicles were harvested; at stage 3, differentiated floral organs on the tips of panicles  
293 were isolated; and at stages 4 and 5, the SS and PS tissues were isolated. For each replicate,  
294 the ten samples for each stage were pooled together. Tissues were immediately frozen in liquid  
295 nitrogen and stored at -80°C prior to RNA extraction.

296 RNA was extracted using the TRIzol reagent, and then treated with DNase and purified  
297 using the RNeasy Mini Clean-up kit (Qiagen). Total RNA quality was examined on 1% agarose  
298 gels and RNA Nanochips on an Agilent 2100 Bioanalyzer (Agilent Technologies). Samples with  
299 RNA integrity number  $\geq 7.0$  were used for library preparation. Poly (A)<sup>+</sup> selection was applied to  
300 RNA via oligo (dT) magnetic beads (Invitrogen 610-02) and eluted in 11  $\mu$ l of water. RNA-seq  
301 library construction was carried out with the ScriptSeq™ v2 kit (Epicentre SSV21124). Final  
302 libraries were amplified with 13 PCR cycles. RNA-seq of three biological replicates was executed  
303 at the sequencing center of Cold Spring Harbor Laboratory on an Illumina HiSeq2500 instrument.

304 RNA-seq data from each sample was first aligned to the sorghum version 3.4 reference  
305 genome using STAR(57). Quantification of gene expression levels in each biological replicate  
306 was performed using Cufflinks(58). The correlation coefficient among the three biological  
307 replicates for each sample was evaluated by the Pearson test in the R statistical environment.  
308 After removal of two low-quality samples, the biological replicates were merged together for  
309 differential expression analysis using Cuffdiff(58). Only genes with at least five reads supported  
310 in at least one sample were subjected to differential expression analysis. The cutoff for differential  
311 expression was an adjusted FDR of  $p < 0.05$ . Motif enrichment analysis was performed using the

312 MEME SUITE(59). GO term analysis was performed with either the agriGO(60) Singular  
313 Enrichment Analysis using the hypergeometric statistical test method with significance level set  
314 to 0.01, or the GO Enrichment Analysis using PANTHER version 11 with all default presets(61).  
315 All raw FASTQ files have been deposited in the NCBI Sequence Read Archive (see Data  
316 Availability statement). Statistical analysis, including PCA biplots (factoextra package), heatmap  
317 generation (heatmap2), along with additional figure generation (ggplot2), was performed using  
318 RStudio v1.1.463(62).

319

### 320 DAP-seq Analysis

321 The full length *MSD1* coding sequence (CDS) was cloned into the pDEST15 Gateway  
322 vector, and the resultant plasmid was transformed into BL21 competent cells. GST-MSD1 protein  
323 was induced by growing cells in Terrific Broth at 28°C while shaking at 220 rpm; isopropyl-beta-  
324 D-thiogalactoside (IPTG) (Goldbio: I2481C25) was added to a final concentration of 0.001 M.  
325 GST-MSD1 protein was purified by resuspending cells in 1x PBS + 10 mM phenylmethanesulfonyl  
326 fluoride (PMSF), and then sonicating at 4° C to disrupt cell membranes and plasmid DNA. Soluble  
327 cell extracts were added to MagneGST beads (Promega) and incubated and washed as  
328 described in Bartlet *et al.* (2017)(63). High-purity DNA was isolated from stage 4–5 developing  
329 BTx623 meristems and sheared on a Covaris S220 sonicator. Template DNA from three biological  
330 replicates was incubated with bead-bound GST-MSD1 protein or GST beads alone (negative  
331 control). The MSD1-bound DNA was then washed, eluted, and ligated with Illumina adaptor  
332 sequences and quality-controlled using Qubit and Bioanalyzer as described in Bartlet *et al.*  
333 (2017). Sequencing was performed using the mid-output from the Illumina NextSeq platform,  
334 multiplexing all six samples, yielding ~16–20 x 10<sup>6</sup> reads per samples. Two separate sequencings  
335 runs were performed on experimental samples to increase detection power, with biological  
336 replicates undergoing 75-bp and 100-bp paired-end reads. The resultant FASTQ files were  
337 aligned and merged as follows: Trimmomatic(64) was used for FASTQ trimming, followed by  
338 Bowtie2(53) alignment and MACS2(65) peak calling (using the bead-only control for background  
339 subtraction), and finally the annotatePeaks program from the Homer(66) package was used to  
340 associate peaks with gene models from the version 3.4 *Sorghum bicolor* reference genome files  
341 housed by Gramene(67, 68). Sorghum GFF and GTF files were both used for annotatePeaks  
342 features functionality; however, the GTF file yielded more total gene-associated peaks than the  
343 GFF file. SAMtools was used for various file formatting and manipulation steps, including sorting  
344 and merging of the 75-bp and 100-bp paired-end read files. Motif enrichment analysis was  
345 performed using the MEME SUITE.

346

### 347 Phenotypic Rescue of *msd2* With Exogenous Methyl-Jasmonate

348 Phenotypic rescue was performed exactly as described in Jiao *et al.* (2018). Briefly,  
349 BTx623 or *msd2* mutant seeds were germinated and grown at 16-hour day cycles at 24°C in a  
350 polyethylene greenhouse in Lubbock, TX. Beginning at leaf stage 7, 1 mL of either 0.05% Tween-  
351 20 (polyethylene glycol sorbitan monolaurate) in water (control) or 0.5 mM or 1.0 mM methyl-  
352 jasmonate in 0.05% Tween-20 was aspirated directly down the floral whorl. This treatment was  
353 repeated every 48 hours until the majority of control plants reached the flag leaf stage. At that  
354 point, all experimental treatments were halted for that genotype. All plants were allowed to mature  
355 to the soft dough stage prior phenotypic rescue evaluation.

356

### 357 **Data Availability**

358

359 Sequencing data is available on the National Center for Biotechnology Information Sequence  
360 Read Archive (NCBI SRA: <https://www.ncbi.nlm.nih.gov/sra>). Accession codes for FASTQ files  
361 are as follows: DAP-seq, PRJNA550273; RNA-seq, SRP127741(7) and PRJNA550261. DAP-seq  
362 BED files from MACS2 calls are available in **Supplementary Data File 1**.

363

### 364 **Author Contributions**

365

366 Conceptualization, Doreen Ware and Zhanguo Xin; Data curation, Nicholas Gladman and  
367 Yinping Jiao; Formal analysis, Nicholas Gladman, Yinping Jiao and Shawn A. Christensen;  
368 Funding acquisition, Doreen Ware and Zhanguo Xin; Investigation, Nicholas Gladman, Young  
369 Koungh Lee, Lifang Zhang, Ratan Chopra, Michael Regulski, Gloria Burow, Chad Hayes, Shawn  
370 A. Christensen, Lavanya Dampanaboina, Junping Chen, John Burke and Zhanguo Xin;  
371 Methodology, Nicholas Gladman and Zhanguo Xin; Project administration, Doreen Ware and  
372 Zhanguo Xin; Validation, Gloria Burow; Visualization, Nicholas Gladman; Writing – original draft,  
373 Nicholas Gladman; Writing – review & editing, Nicholas Gladman, Yinping Jiao, Young Koungh  
374 Lee, Lifang Zhang, Ratan Chopra, Gloria Burow, Chad Hayes, Shawn A. Christensen, Lavanya  
375 Dampanaboina, Doreen Ware and Zhanguo Xin.

376

### 377 **Acknowledgement**

378 NG, YJ, RC, GB, JB, CH, and ZX acknowledge support from the United Sorghum Checkoff  
379 program. ZX was also partly supported by USDA ARS 3096-21000-019-00-D. YJ, YKL, NG, MR,

380 and DW were partly supported by USDA ARS 8062-21000-041-00D. YKL acknowledges that this  
381 work was supported by a grant from the Next-Generation BioGreen 21 Program (Project No.  
382 PJ013658032019), Rural Development Administration, Republic of Korea, and R&D Program of  
383 'Plasma Advanced Technology for Agriculture and Food (Plasma Farming)' through the National  
384 Fusion Research Institute of Korea (NFRI). NG was supported by an ARS-funded postdoc  
385 fellowship.

386

## 387 Work Cited

- 388 1. S. L. Dillon *et al.*, Domestication to crop improvement: genetic resources for Sorghum and  
389 Saccharum (Andropogoneae). *Ann Bot* **100**, 975-989 (2007).
- 390 2. D. W. a. Huckabay, The Origin of Sorghum Bicolor. II Distribution and Domestication.  
391 *Evolution* **21**, 787-802 (1967).
- 392 3. A. H. Paterson *et al.*, The Sorghum bicolor genome and the diversification of grasses.  
393 *Nature* **457**, 551-556 (2009).
- 394 4. W. Jiang *et al.*, Demonstration of CRISPR/Cas9/sgRNA-mediated targeted gene  
395 modification in Arabidopsis, tobacco, sorghum and rice. *Nucleic Acids Res* **41**, e188  
396 (2013).
- 397 5. Y. Ding, H. Li, L. L. Chen, K. Xie, Recent Advances in Genome Editing Using  
398 CRISPR/Cas9. *Front Plant Sci* **7**, 703 (2016).
- 399 6. P. J. Brown *et al.*, Inheritance of inflorescence architecture in sorghum. *Theor Appl Genet*  
400 **113**, 931-942 (2006).
- 401 7. Y. Jiao *et al.*, MSD1 regulates pedicellate spikelet fertility in sorghum through the jasmonic  
402 acid pathway. *Nat Commun* **9**, 822 (2018).
- 403 8. J. Dalberg, *Classification and characterization of sorghum. Sorghum: origin, history,*  
404 *technology, and production.* (2000), pp. 99-130.
- 405 9. Z. Yuan, D. Zhang, Roles of jasmonate signalling in plant inflorescence and flower  
406 development. *Curr Opin Plant Biol* **27**, 44-51 (2015).
- 407 10. C. Wasternack, B. Hause, Jasmonates: biosynthesis, perception, signal transduction and  
408 action in plant stress response, growth and development. An update to the 2007 review in  
409 *Annals of Botany. Ann Bot* **111**, 1021-1058 (2013).
- 410 11. R. Lyons, J. M. Manners, K. Kazan, Jasmonate biosynthesis and signaling in monocots:  
411 a comparative overview. *Plant Cell Rep* **32**, 815-827 (2013).
- 412 12. A. Robert-Seilaniantz, M. Grant, J. D. Jones, Hormone crosstalk in plant disease and  
413 defense: more than just jasmonate-salicylate antagonism. *Annu Rev Phytopathol* **49**, 317-  
414 343 (2011).
- 415 13. Y. Yan *et al.*, Disruption of OPR7 and OPR8 reveals the versatile functions of jasmonic  
416 acid in maize development and defense. *Plant Cell* **24**, 1420-1436 (2012).
- 417 14. M. Ye *et al.*, silencing COI1 in rice increases susceptibility to chewing insects and impairs  
418 inducible defense. *PLoS One* **7**, e36214 (2012).
- 419 15. Q. Cai *et al.*, Jasmonic acid regulates spikelet development in rice. *Nat Commun* **5**, 3476  
420 (2014).
- 421 16. I. F. Acosta *et al.*, tasselseed1 is a lipoxygenase affecting jasmonic acid signaling in sex  
422 determination of maize. *Science* **323**, 262-265 (2009).
- 423 17. A. DeLong, A. Calderon-Urrea, S. L. Dellaporta, Sex determination gene TASSELSEED2  
424 of maize encodes a short-chain alcohol dehydrogenase required for stage-specific floral  
425 organ abortion. *Cell* **74**, 757-768 (1993).

- 426 18. F. Schaller, C. Biesgen, C. Mussig, T. Altmann, E. W. Weiler, 12-Oxophytodienoate  
427 reductase 3 (OPR3) is the isoenzyme involved in jasmonate biosynthesis. *Planta* **210**,  
428 979-984 (2000).
- 429 19. A. Stintzi, J. Browse, The Arabidopsis male-sterile mutant, opr3, lacks the 12-  
430 oxophytodienoic acid reductase required for jasmonate synthesis. *Proc Natl Acad Sci U S*  
431 *A* **97**, 10625-10630 (2000).
- 432 20. J. H. Park *et al.*, A knock-out mutation in allene oxide synthase results in male sterility and  
433 defective wound signal transduction in Arabidopsis due to a block in jasmonic acid  
434 biosynthesis. *Plant J* **31**, 1-12 (2002).
- 435 21. A. J. Koo, T. F. Cooke, G. A. Howe, Cytochrome P450 CYP94B3 mediates catabolism  
436 and inactivation of the plant hormone jasmonoyl-L-isoleucine. *Proc Natl Acad Sci U S A*  
437 **108**, 9298-9303 (2011).
- 438 22. C. Lunde, A. Kimberlin, S. Leiboff, A. J. Koo, S. Hake, Tasselseed5 overexpresses a  
439 wound-inducible enzyme, ZmCYP94B1, that affects jasmonate catabolism, sex  
440 determination, and plant architecture in maize. *Commun Biol* **2**, 114 (2019).
- 441 23. D. Caldelari, G. Wang, E. E. Farmer, X. Dong, Arabidopsis lox3 lox4 double mutants are  
442 male sterile and defective in global proliferative arrest. *Plant Mol Biol* **75**, 25-33 (2011).
- 443 24. Y. Jiao *et al.*, A Sorghum Mutant Resource as an Efficient Platform for Gene Discovery in  
444 Grasses. *Plant Cell* **28**, 1551-1562 (2016).
- 445 25. I. Feussner, C. Wasternack, The lipoxygenase pathway. *Annu Rev Plant Biol* **53**, 275-297  
446 (2002).
- 447 26. D. Luo, R. Carpenter, C. Vincent, L. Cosey, E. Coen, Origin of floral asymmetry in  
448 *Antirrhinum*. *Nature* **383**, 794-799 (1996).
- 449 27. J. Doebley, A. Stec, L. Hubbard, The evolution of apical dominance in maize. *Nature* **386**,  
450 485-488 (1997).
- 451 28. S. Kosugi, Y. Ohashi, PCF1 and PCF2 specifically bind to cis elements in the rice  
452 proliferating cell nuclear antigen gene. *Plant Cell* **9**, 1607-1619 (1997).
- 453 29. R. M. Davidson *et al.*, Comparative transcriptomics of three Poaceae species reveals  
454 patterns of gene expression evolution. *Plant J* **71**, 492-502 (2012).
- 455 30. Y. Makita *et al.*, MOROKOSHI: transcriptome database in Sorghum bicolor. *Plant Cell*  
456 *Physiol* **56**, e6 (2015).
- 457 31. R. Petryszak *et al.*, Expression Atlas update--a database of gene and transcript  
458 expression from microarray- and sequencing-based functional genomics experiments.  
459 *Nucleic Acids Res* **42**, D926-932 (2014).
- 460 32. A. Olson *et al.*, Expanding and Vetting Sorghum bicolor Gene Annotations through  
461 Transcriptome and Methylome Sequencing. *The Plant Genome* **7** (2014).
- 462 33. H. Huang, B. Liu, L. Liu, S. Song, Jasmonate action in plant growth and development. *J*  
463 *Exp Bot* **68**, 1349-1359 (2017).
- 464 34. Y. Zhang, J. G. Turner, Wound-induced endogenous jasmonates stunt plant growth by  
465 inhibiting mitosis. *PLoS One* **3**, e3699 (2008).
- 466 35. R. C. O'Malley *et al.*, Cistrome and Epicistrome Features Shape the Regulatory DNA  
467 Landscape. *Cell* **166**, 1598 (2016).
- 468 36. W. Li *et al.*, Genome-wide identification and characterization of TCP transcription factor  
469 genes in upland cotton (*Gossypium hirsutum*). *Sci Rep* **7**, 10118 (2017).
- 470 37. M. T. Weirauch *et al.*, Determination and inference of eukaryotic transcription factor  
471 sequence specificity. *Cell* **158**, 1431-1443 (2014).
- 472 38. M. Stitz, I. T. Baldwin, E. Gaquerel, Diverting the flux of the JA pathway in *Nicotiana*  
473 *attenuata* compromises the plant's defense metabolism and fitness in nature and  
474 glasshouse. *PLoS One* **6**, e25925 (2011).
- 475 39. P. Ahmad *et al.*, Jasmonates: Multifunctional Roles in Stress Tolerance. *Front Plant Sci*  
476 **7**, 813 (2016).

- 477 40. C. Li *et al.*, Role of beta-oxidation in jasmonate biosynthesis and systemic wound signaling  
478 in tomato. *Plant Cell* **17**, 971-986 (2005).
- 479 41. L. Yan *et al.*, Role of tomato lipoxygenase D in wound-induced jasmonate biosynthesis  
480 and plant immunity to insect herbivores. *PLoS Genet* **9**, e1003964 (2013).
- 481 42. S. Dobritsch *et al.*, Dissection of jasmonate functions in tomato stamen development by  
482 transcriptome and metabolome analyses. *BMC Biol* **13**, 28 (2015).
- 483 43. T. Niwa *et al.*, Jasmonic acid facilitates flower opening and floral organ development  
484 through the upregulated expression of SIMYB21 transcription factor in tomato. *Biosci*  
485 *Biotechnol Biochem* **82**, 292-303 (2018).
- 486 44. H. Bull *et al.*, Barley SIX-ROWED SPIKE3 encodes a putative Jumonji C-type  
487 H3K9me2/me3 demethylase that represses lateral spikelet fertility. *Nat Commun* **8**, 936  
488 (2017).
- 489 45. S. Ishiguro, A. Kawai-Oda, J. Ueda, I. Nishida, K. Okada, The DEFECTIVE IN ANTHOR  
490 DEHISCENCE gene encodes a novel phospholipase A1 catalyzing the initial step of  
491 jasmonic acid biosynthesis, which synchronizes pollen maturation, anther dehiscence,  
492 and flower opening in Arabidopsis. *Plant Cell* **13**, 2191-2209 (2001).
- 493 46. B. Shuai, C. G. Reynaga-Pena, P. S. Springer, The lateral organ boundaries gene defines  
494 a novel, plant-specific gene family. *Plant Physiol* **129**, 747-761 (2002).
- 495 47. X. Y. Yang, W. J. Jiang, H. J. Yu, The expression profiling of the lipoxygenase (LOX)  
496 family genes during fruit development, abiotic stress and hormonal treatments in  
497 cucumber (*Cucumis sativus* L.). *Int J Mol Sci* **13**, 2481-2500 (2012).
- 498 48. G. J. Tiwari, Q. Liu, P. Shreshtha, Z. Li, S. Rahman, RNAi-mediated down-regulation of  
499 the expression of OsFAD2-1: effect on lipid accumulation and expression of lipid  
500 biosynthetic genes in the rice grain. *BMC Plant Biol* **16**, 189 (2016).
- 501 49. N. De Geyter, A. Gholami, S. Goormachtig, A. Goossens, Transcriptional machineries in  
502 jasmonate-elicited plant secondary metabolism. *Trends Plant Sci* **17**, 349-359 (2012).
- 503 50. H. K. Long, S. L. Prescott, J. Wysocka, Ever-Changing Landscapes: Transcriptional  
504 Enhancers in Development and Evolution. *Cell* **167**, 1170-1187 (2016).
- 505 51. Z. Xin *et al.*, Applying genotyping (TILLING) and phenotyping analyses to elucidate gene  
506 function in a chemically induced sorghum mutant population. *BMC Plant Biol* **8**, 103  
507 (2008).
- 508 52. Z. Xin, J. Chen, A high throughput DNA extraction method with high yield and quality.  
509 *Plant Methods* **8**, 26 (2012).
- 510 53. B. Langmead, S. L. Salzberg, Fast gapped-read alignment with Bowtie 2. *Nat Methods* **9**,  
511 357-359 (2012).
- 512 54. H. Li *et al.*, The Sequence Alignment/Map format and SAMtools. *Bioinformatics* **25**, 2078-  
513 2079 (2009).
- 514 55. W. McLaren *et al.*, Deriving the consequences of genomic variants with the Ensembl API  
515 and SNP Effect Predictor. *Bioinformatics* **26**, 2069-2070 (2010).
- 516 56. M. K. Monaco *et al.*, Gramene 2013: comparative plant genomics resources. *Nucleic Acids*  
517 *Res* **42**, D1193-1199 (2014).
- 518 57. A. Dobin *et al.*, STAR: ultrafast universal RNA-seq aligner. *Bioinformatics* **29**, 15-21  
519 (2013).
- 520 58. C. Trapnell *et al.*, Transcript assembly and quantification by RNA-Seq reveals  
521 unannotated transcripts and isoform switching during cell differentiation. *Nat Biotechnol*  
522 **28**, 511-515 (2010).
- 523 59. T. L. Bailey *et al.*, MEME SUITE: tools for motif discovery and searching. *Nucleic Acids*  
524 *Res* **37**, W202-208 (2009).
- 525 60. Z. Du, X. Zhou, Y. Ling, Z. Zhang, Z. Su, agriGO: a GO analysis toolkit for the agricultural  
526 community. *Nucleic Acids Res* **38**, W64-70 (2010).

- 527 61. H. Mi *et al.*, PANTHER version 11: expanded annotation data from Gene Ontology and  
528 Reactome pathways, and data analysis tool enhancements. *Nucleic Acids Res* **45**, D183-  
529 D189 (2017).
- 530 62. R. Team (2015) RStudio: Integrated Development for R. RStudio, Inc., Boston, MA.
- 531 63. A. Bartlett *et al.*, Mapping genome-wide transcription-factor binding sites using DAP-seq.  
532 *Nat Protoc* **12**, 1659-1672 (2017).
- 533 64. A. M. Bolger, M. Lohse, B. Usadel, Trimmomatic: a flexible trimmer for Illumina sequence  
534 data. *Bioinformatics* **30**, 2114-2120 (2014).
- 535 65. Y. Zhang *et al.*, Model-based analysis of ChIP-Seq (MACS). *Genome Biol* **9**, R137 (2008).
- 536 66. S. Heinz *et al.*, Simple combinations of lineage-determining transcription factors prime cis-  
537 regulatory elements required for macrophage and B cell identities. *Mol Cell* **38**, 576-589  
538 (2010).
- 539 67. M. K. Tello-Ruiz *et al.*, Gramene 2018: unifying comparative genomics and pathway  
540 resources for plant research. *Nucleic Acids Res* **46**, D1181-D1189 (2018).
- 541 68. R. F. McCormick *et al.*, The Sorghum bicolor reference genome: improved assembly, gene  
542 annotations, a transcriptome atlas, and signatures of genome organization. *Plant J* **93**,  
543 338-354 (2018).
- 544
- 545
- 546
- 547
- 548
- 549
- 550
- 551
- 552
- 553
- 554
- 555
- 556
- 557
- 558
- 559
- 560
- 561
- 562
- 563
- 564
- 565
- 566
- 567
- 568
- 569
- 570
- 571
- 572
- 573
- 574



## 575 Figures and Captions

576

577

578 **Figure 1. A)** Boxshade section of a MUSCLE alignment for MSD2-orthologous sorghum, maize,  
579 rice, and Arabidopsis LOX peptide sequences surrounding the EMS-induced changes within  
580 MSD2. Arrows with red highlights indicate the positions of the *msd2-1* (GLN > premature stop)  
581 and *msd2-2* (Ala > Val) mutations. The values above the middle arrow denote the peptide residue  
582 numbers for all LOX paralogs in the alignment. Below the alignment is a diagram of the *MSD2*  
583 gene; colored boxes indicate encoded domains of the gene product. The sizes of legend boxes  
584 are equivalent to 100 base pairs. **B)** Phylogenetic tree of sorghum 9- and 13-LOX proteins (*MSD2*  
585 highlighted in red). **C)** RNA-seq FPKM expression data of the 13-LOX paralogs across developing  
586 panicle tissue stages (colors correspond to panel **B**). **D)** SEM images of developing inflorescence  
587 meristems in WT and *msd2-1*. Scale bars are 1 mm in length for stages 1, 4, and 5, and 500  $\mu$ m  
588 for stage 3. Sessile spikelets (SS) are indicated in red and pedicellate spikelets (PS) in orange.  
589 **E)** A section of a secondary branch of late-dough filling panicles from WT and *msd2-1* lines.

590

591 **Figure 2.** Phenotypic rescue of *msd2* plants with exogenous application of methyl-JA. WT and  
592 *msd2* lines were treated every 48 hours with either water + 0.05% Tween-20 or 1 mM Me-JA +  
593 0.05% Tween-20.

594

595 **Figure 3.** Transcriptomic profile showing the WT:*msd2* log<sub>2</sub>(fold change) of **A)** JA biosynthetic  
596 pathway genes and **B)** only LOX paralogs (based on homology from *Arabidopsis* and maize  
597 orthologs) across various stages of meristem development. **C)** Principal component analysis  
598 (PCA) biplot and **D)** eigenvectors of meristem stages from *msd1* and *msd2* RNA-seq data for the  
599 JA biosynthesis genes. Plot points are colored and sized according to dimensional contribution  
600 and quality, respectively. Eigenvectors are colored according to dimensional contribution.

601

602 **Figure 4.** MSD1 as a regulator of developmental signaling genes. **A)** Yeast 1-Hybrid of MSD1-  
603 mediated activation of gene expression by binding to the *MSD1* and *MSD2* upstream promoter  
604 regions. **B)** TCP binding motif enriched in the MSD1 DAP-seq peaks that are localized within 2000  
605 bp of an annotated gene transcriptional start site (TSS). **C)** RNA-seq data from *msd1* showing  
606 downregulation across developing panicles stages in coordination with highlighted DAP-seq  
607 peaks localized near the TSSs of JA pathway genes. **D)** Enriched DNA-binding motifs from all  
608 significant DAP-seq peak sequences, regardless of distance from an annotated gene TSS.

609

610 **Supplemental Table 2.** All MSD1 DAP-seq peaks as called by MAC2 peak caller and annotated  
611 to nearby gene models using the annotatePeaks module from the HOMER package.

612

613 **Supplemental Figure 1. A)** Dissected PSs from WT and *msd2-1* panicles showing the presence  
614 of mature pistils in the LOX mutants while the WT flowers lack a mature gynoceium. **B)**  
615 Phylogenetic tree of all sorghum, maize, rice, and Arabidopsis LOX genes based on full peptide  
616 sequence. Sorghum MSD2 is highlighted in red and maize TS1 in green. **C)** Boxplot of days to  
617 panicle emergence. **D)** Boxplot of mass/100 seeds. **E)** Boxplot of root length at 5DAG. **F)** Root  
618 growth measured over 5 days of young seedlings. **G)** Expression (FPKM) of the 13-LOX paralog  
619 genes in the roots of BTx623 plants.

620

621 **Supplemental Figure 2. A)** Protein–protein interaction network from STRING database of all  
622 genes downregulated by  $\geq 2$ -fold in *msd2* mutant lines. **B)** GO term enrichment for downregulated  
623 genes.

624

625 **Supplemental Figure 3. A)** Protein–protein interaction network from STRING database of all  
626 genes upregulated by  $\geq 2$ -fold in *msd2* mutant lines. **B)** GO term enrichment for upregulated  
627 genes.

628  
629 **Supplemental Figure 4. A–B)** RNA-seq data from *msd1* (**A**) and *msd2* (**B**) of putative targets of  
630 MSD1 regulation (identified by Jiao *et al.* 2018). **C)** Principal component analysis (PCA) biplot  
631 and **D)** eigenvectors of the meristem stages of *msd1* and *msd2* RNA-seq data of JA pathway  
632 genes. Plot points are colored and sized according to dimensional contribution and quality.  
633 Eigenvectors are colored according to dimensional contribution.

634  
635 **Supplemental Figure 5. A)** MEME analysis showing enrichment of several transcription factor  
636 binding motifs in the upstream regions of JA biosynthetic and signaling genes, including those for  
637 bZIP, TCP, AP2 (Apetala family), BZR (brassinazole-resistant family), and WRKY. **B)** MEME  
638 analysis showing enrichment of motifs upstream of the putative MSD1 candidate targets identified  
639 by Jiao *et al.* (2018), which include binding motifs recognized by E2F (Della), AP2, Myb/FAR1  
640 (FAR-Red Impaired Response 1), and TCP transcription factors.

641  
642 **Supplemental Figure 6.** Proposed molecular model of the *multiseeded* phenotype. In WT plants,  
643 at panicle development stage 4 (post–floral transition), normal JA signaling occurs, resulting in  
644 retardation or outright prevention of male and female organs in the PS. However, in *msd* mutants,  
645 this normal developmental signal is ablated through the loss of transcription factor binding activity  
646 (*msd1*) or transcriptomic feedback of insufficient JA biosynthetic gene expression (*msd2*).  
647

648 **Figure 1**

**A**

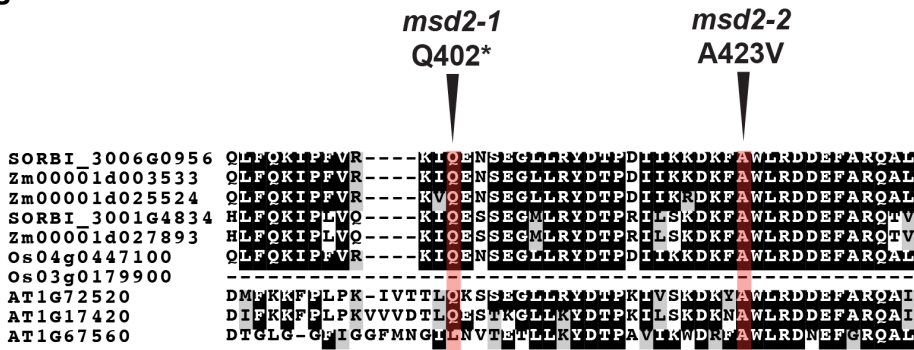

**B**

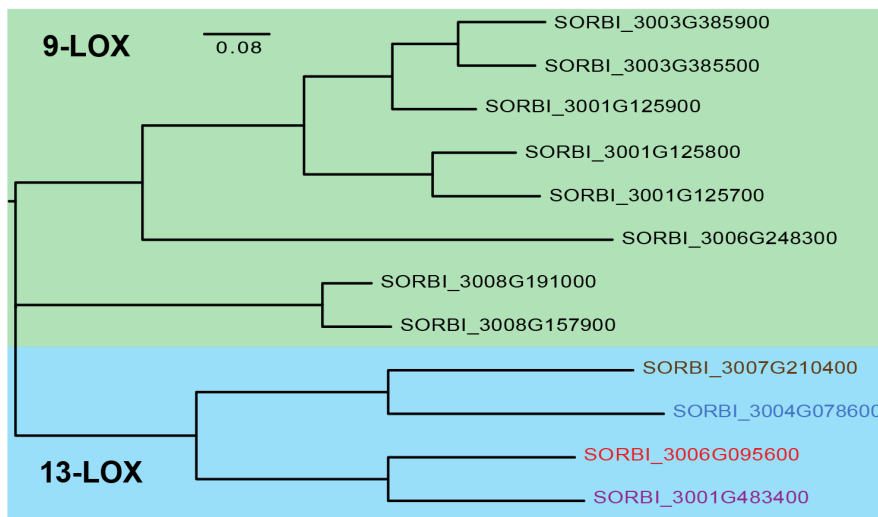

**C**

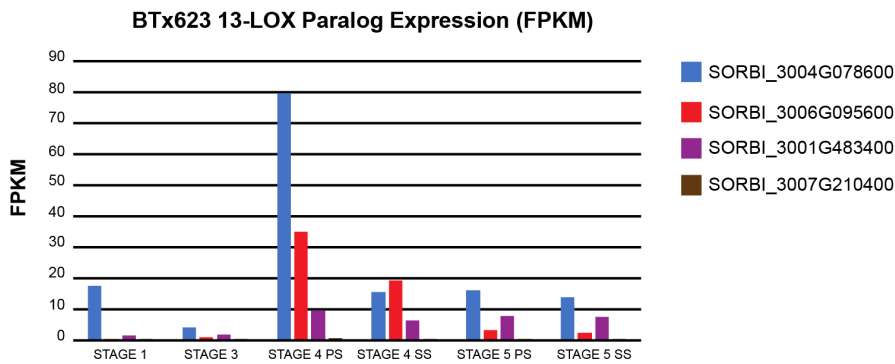

**D**

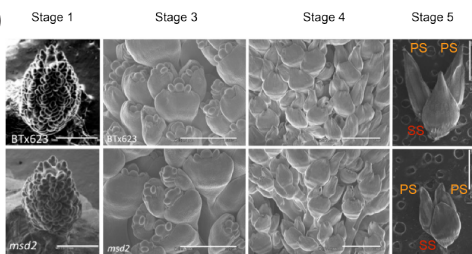

**E**

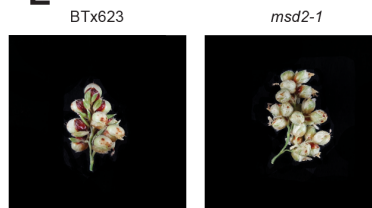

650

**Figure 2**

BTx623 untreated

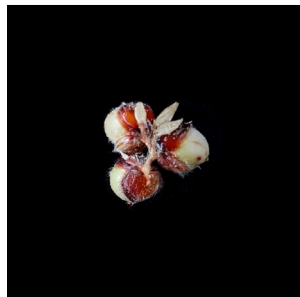

BTx623 water

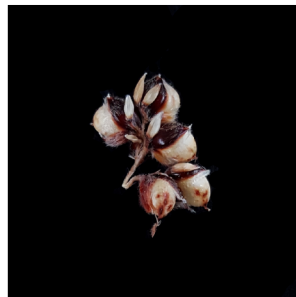

BTx623 1mM Me-JA

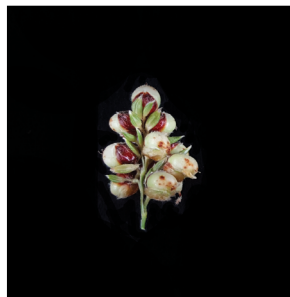

*msd2* untreated

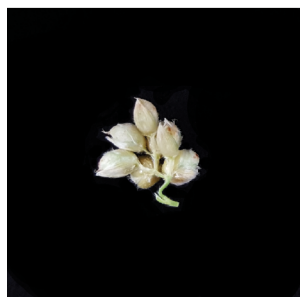

*msd2* water

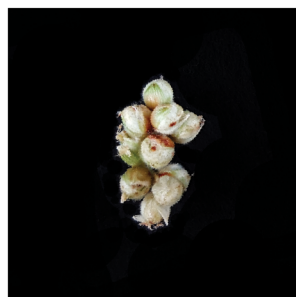

*msd2* 1mM Me-JA

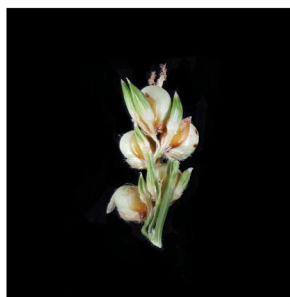

651

652

653 **Figure 3**

**A**

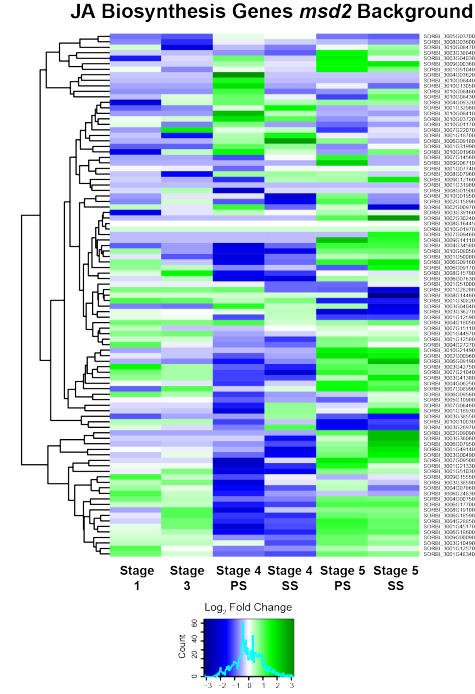

**B**

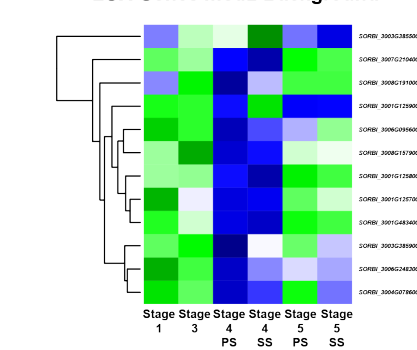

**C**

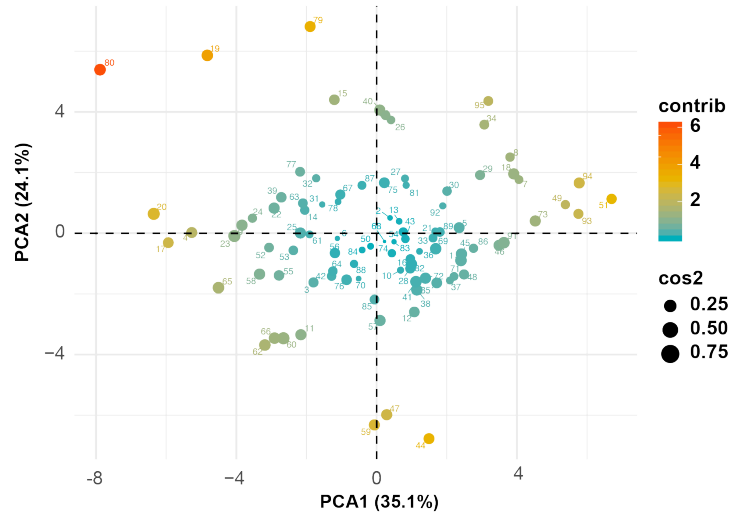

**D**

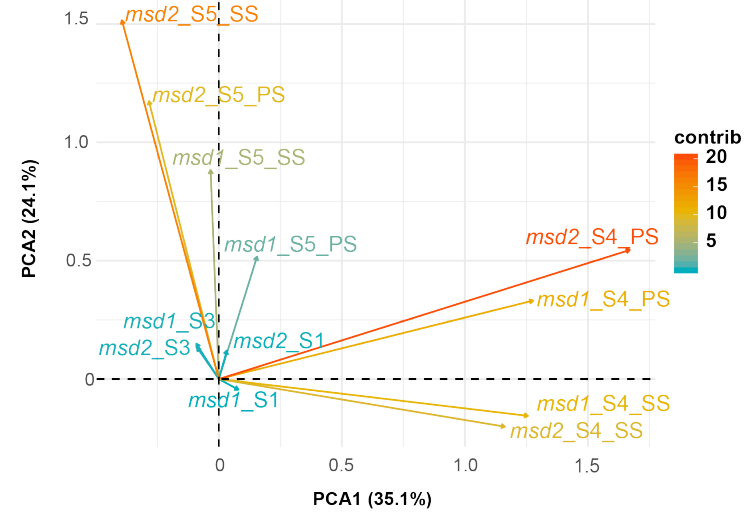

654  
655

656 **Figure 4**

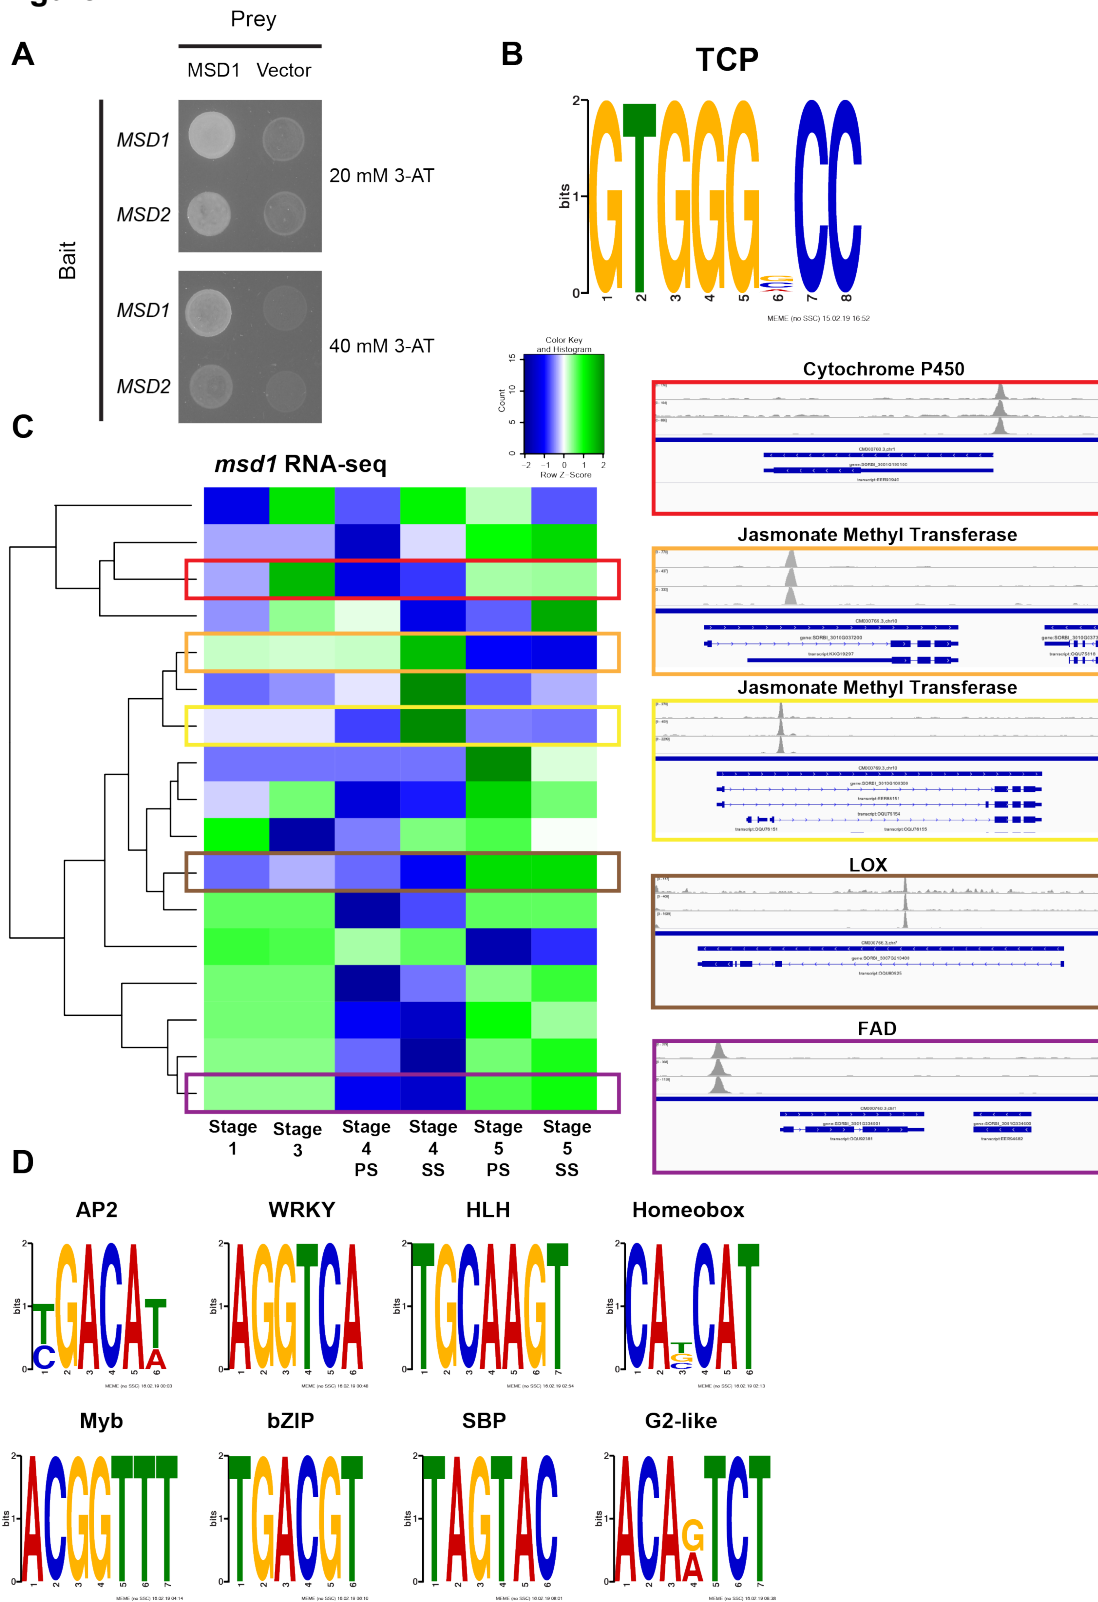

658 **Supplemental Figure 1**

**A** BTx623

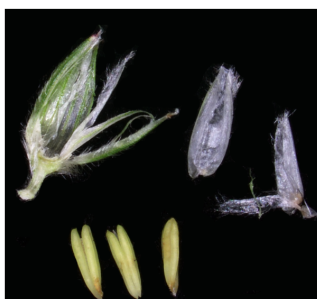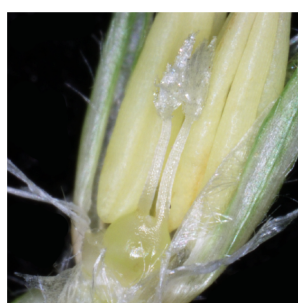

*msd2-1*

**B**

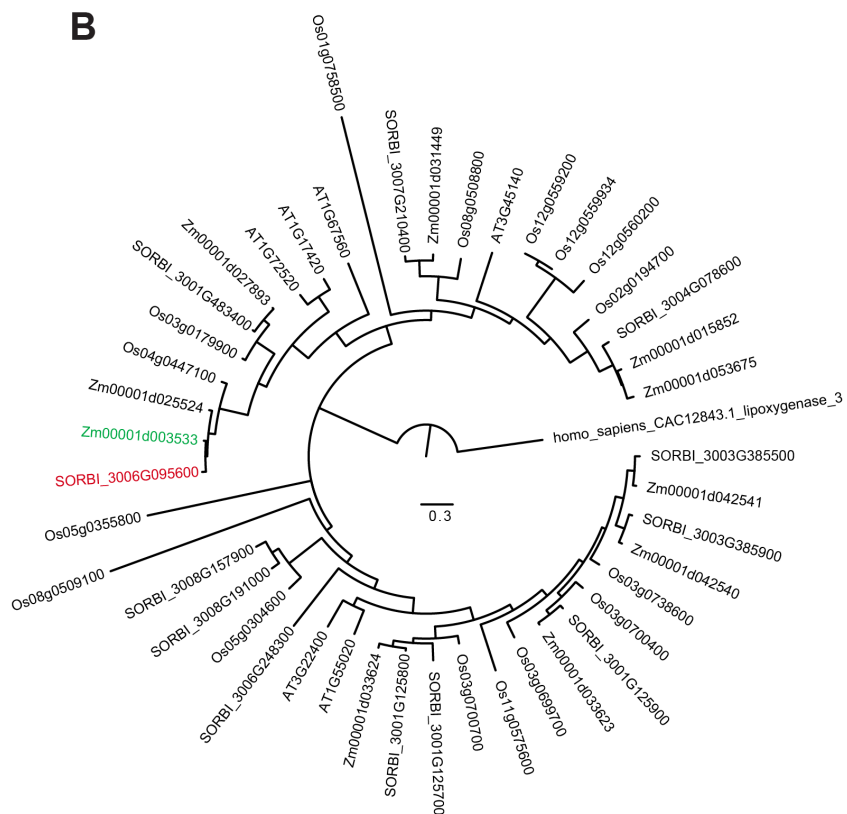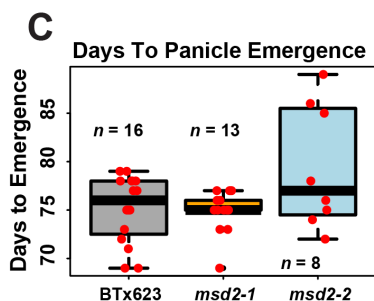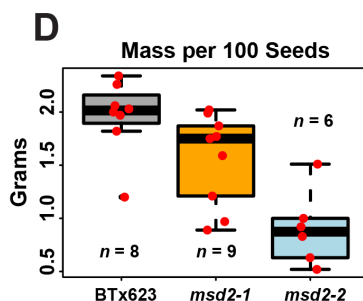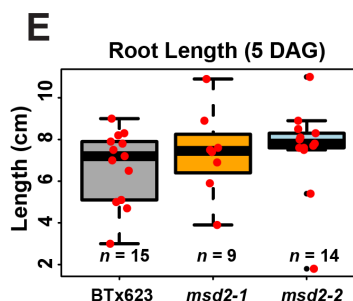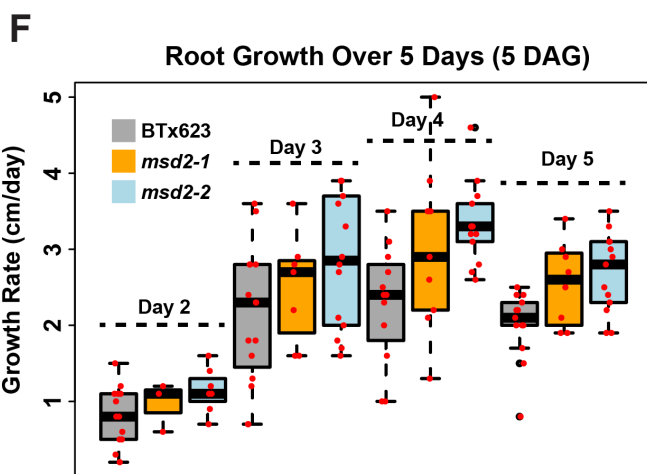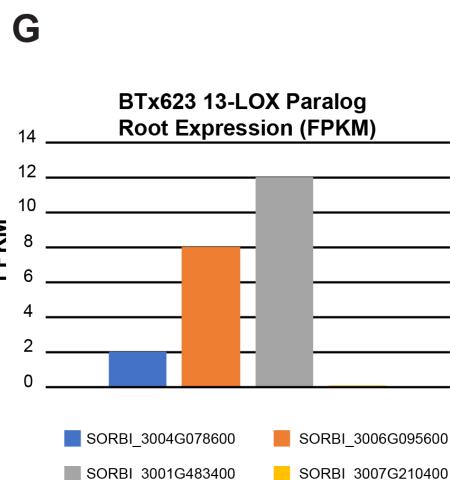

661 **Supplemental Figure 2**

**A**

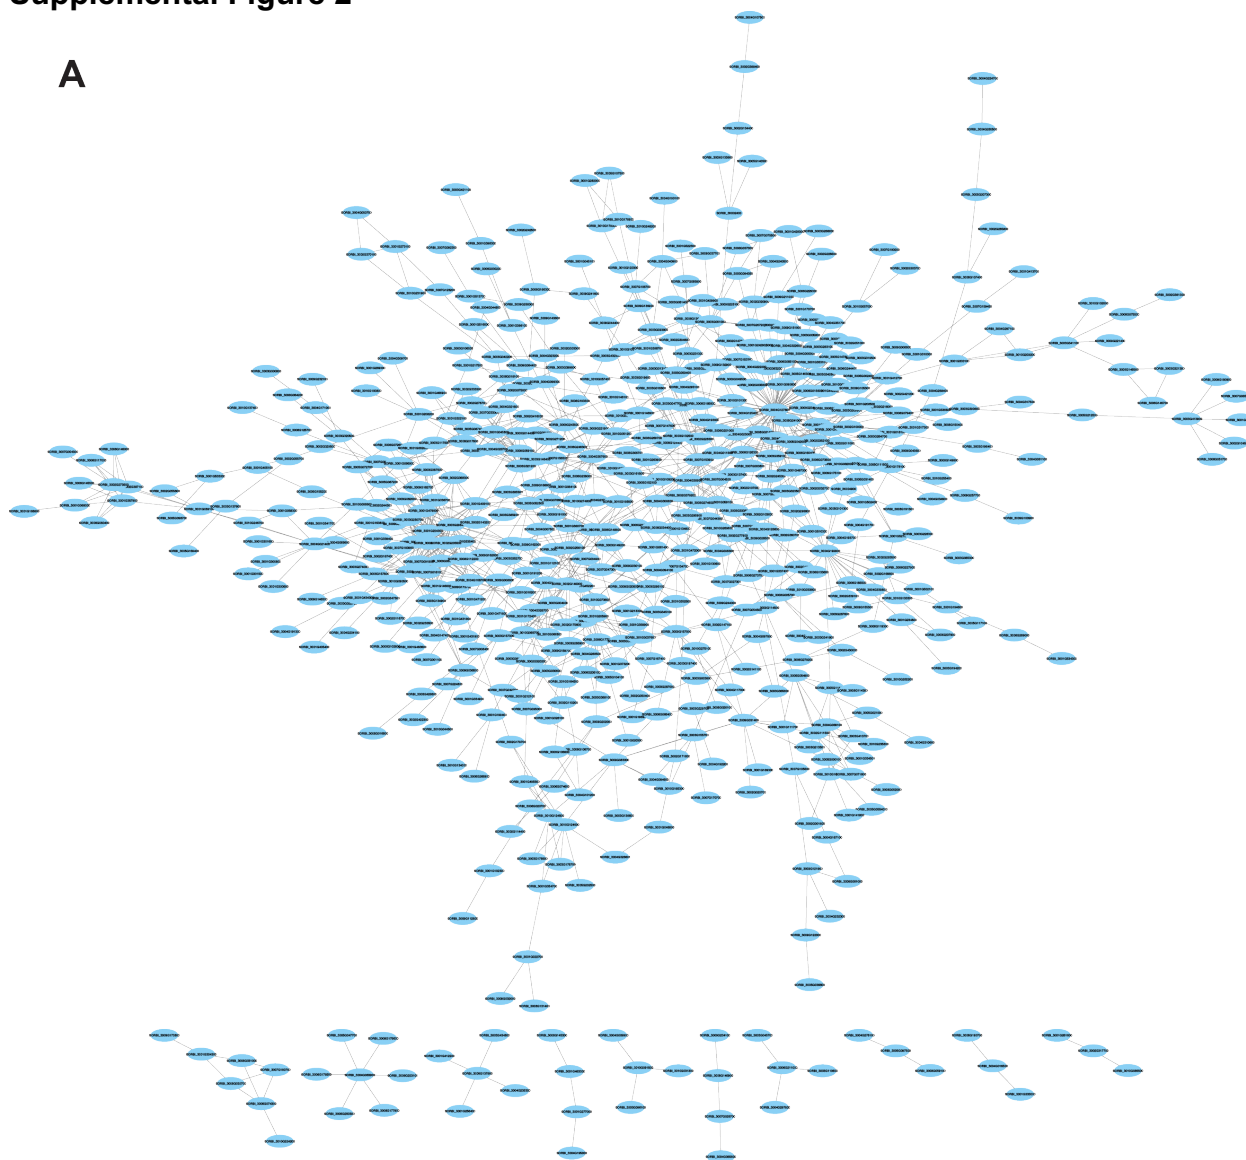

**B**

| GO Biological Process                         | Fold Enrichment (over reference) | p-value  | FDR      |
|-----------------------------------------------|----------------------------------|----------|----------|
| Oxylipin biosynthetic process (GO:0031408)    | 6.29                             | 3.64E-05 | 3.30E-03 |
| Beta-glucan biosynthetic process (GO:0051274) | 3.94                             | 1.35E-07 | 2.24E-05 |
| Cellulose biosynthetic process (GO:0030244)   | 3.43                             | 6.53E-05 | 5.10E-03 |
| Actin cytoskeleton organization (GO:0030036)  | 2.92                             | 7.37E-05 | 5.44E-03 |
| Fatty acid metabolic process (GO:0006631)     | 2.5                              | 2.35E-06 | 2.40E-04 |
| Cell wall organization (GO:0071555)           | 1.77                             | 1.23E-04 | 8.14E-03 |

662  
663  
664



665 **Supplemental Figure 3**

**A**

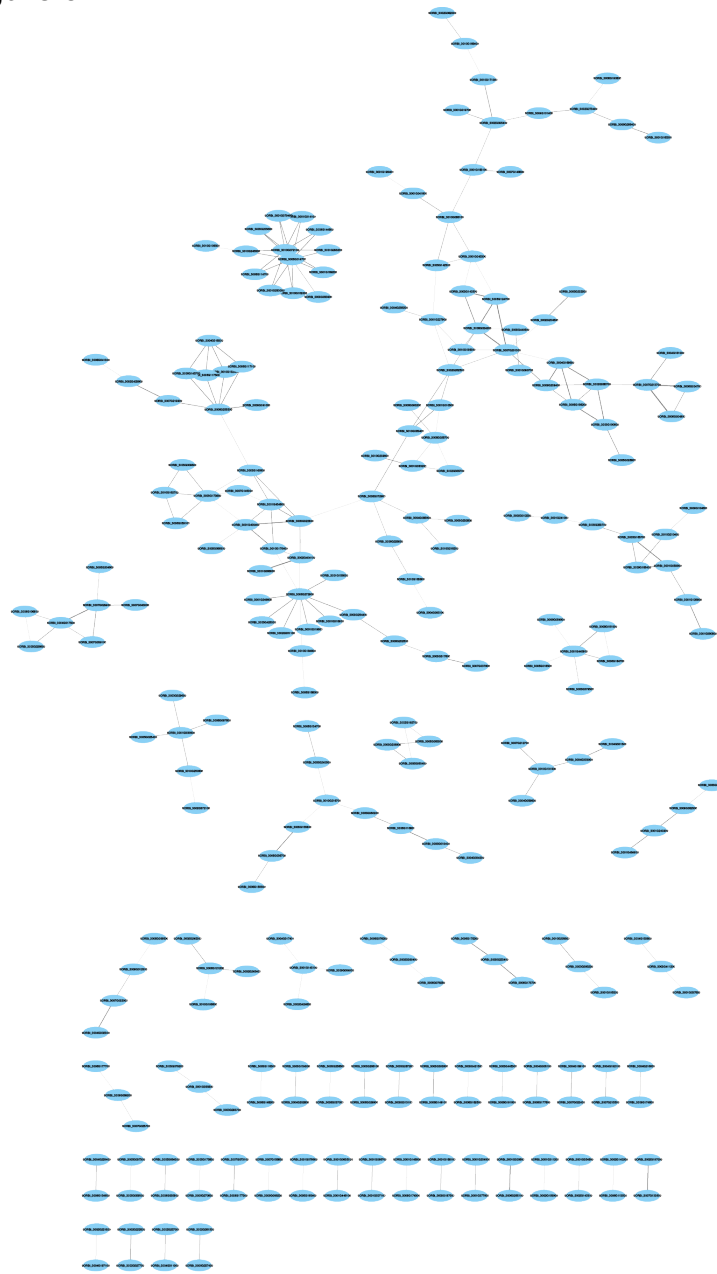

**B**

| GO Biological Process                            | Fold Enrichment (over reference) | p-value  | FDR      |
|--------------------------------------------------|----------------------------------|----------|----------|
| Regulation of biological process (GO:0050789)    | 0.69                             | 7.60E-05 | 6.18E-03 |
| Primary metabolic process (GO:0044238)           | 0.62                             | 9.40E-16 | 3.74E-13 |
| Nitrogen compound metabolic process (GO:0006807) | 0.55                             | 2.67E-18 | 2.66E-15 |
| Cellular component organization (GO:0016043)     | 0.5                              | 1.44E-05 | 1.44E-03 |

666  
667  
668  
669

670 **Supplemental Figure 4**

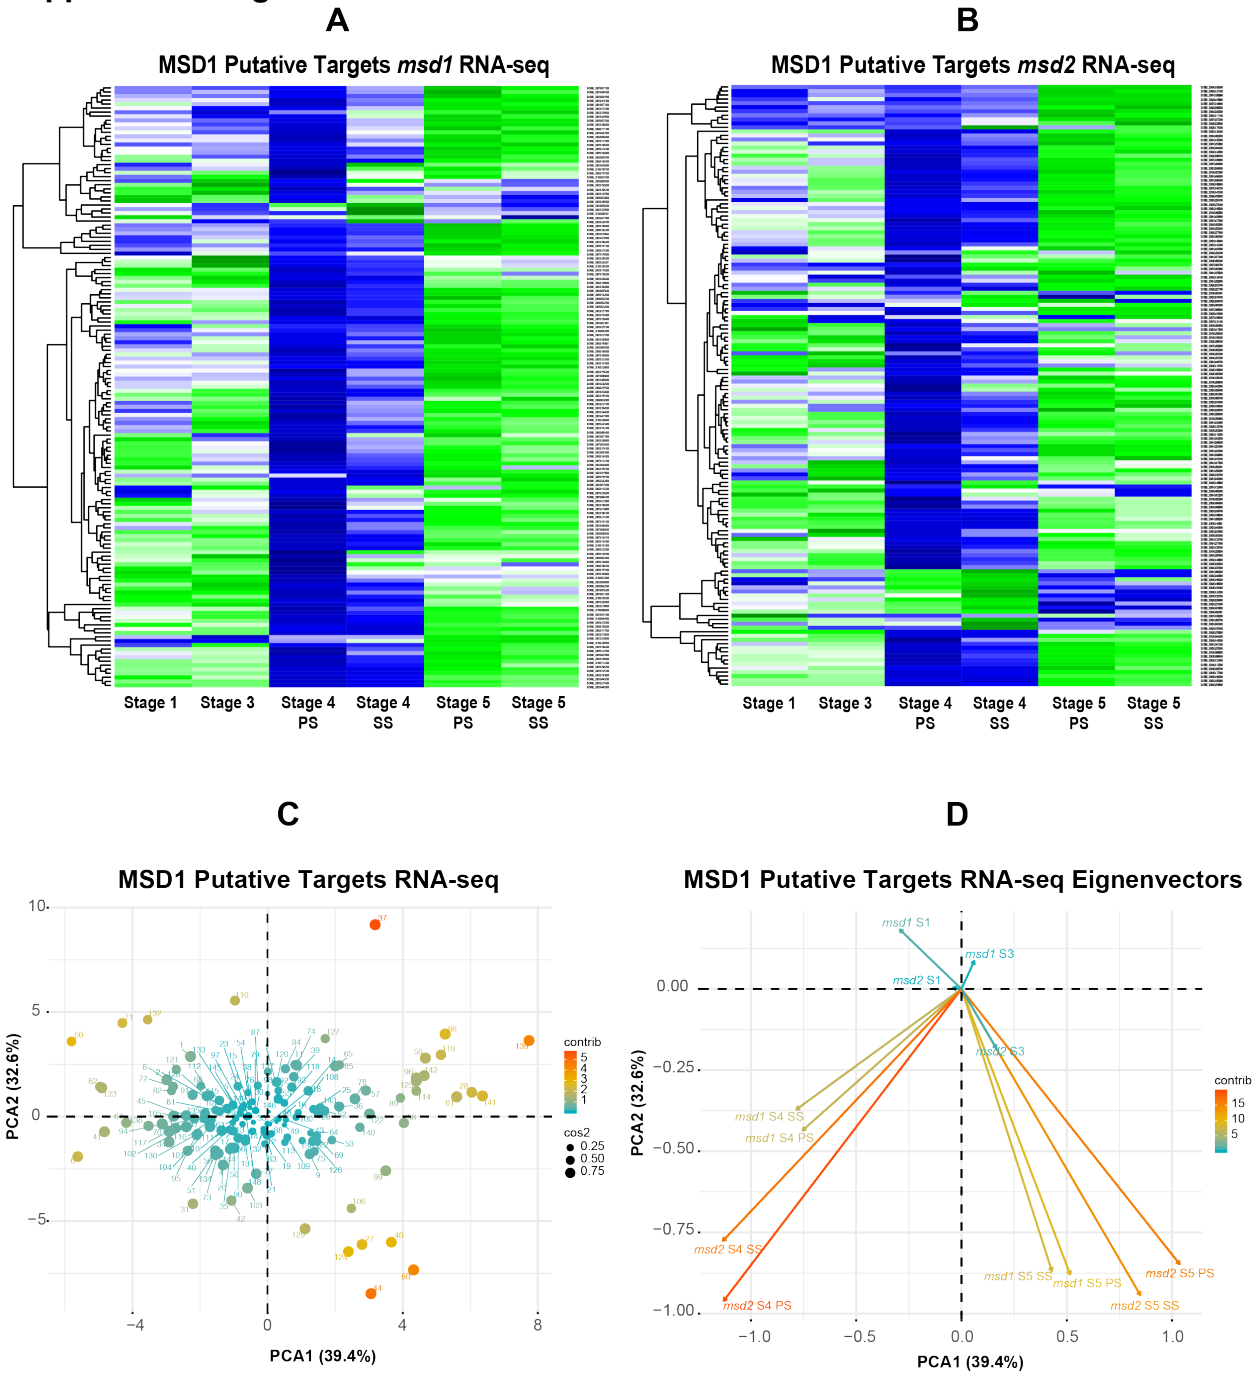

674 Supplemental Figure 5

**A**

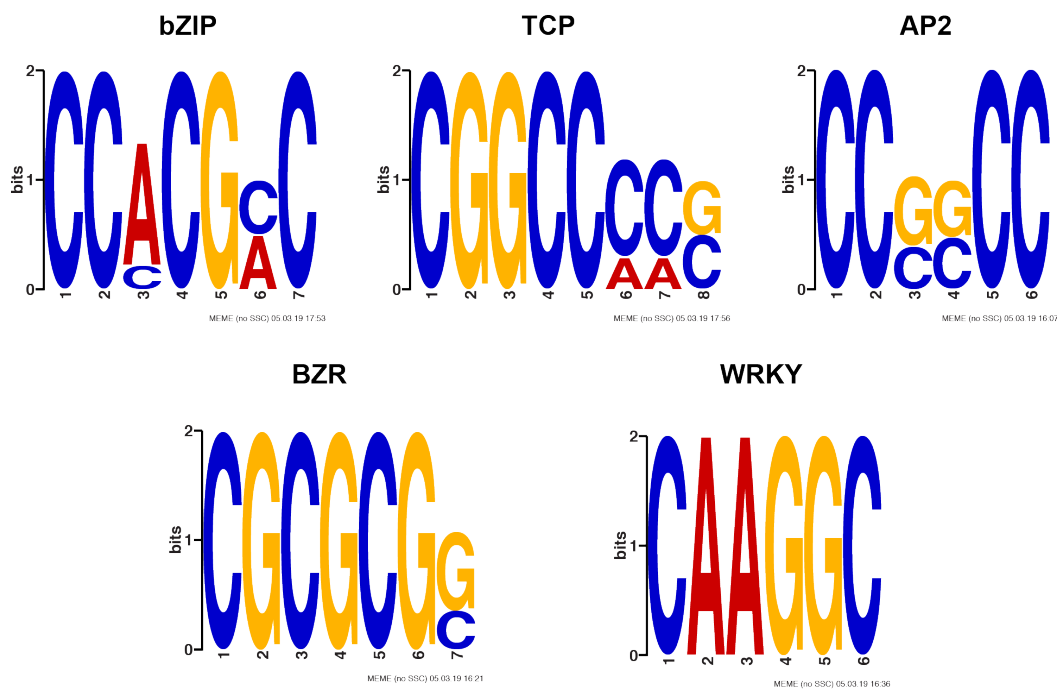

**B**

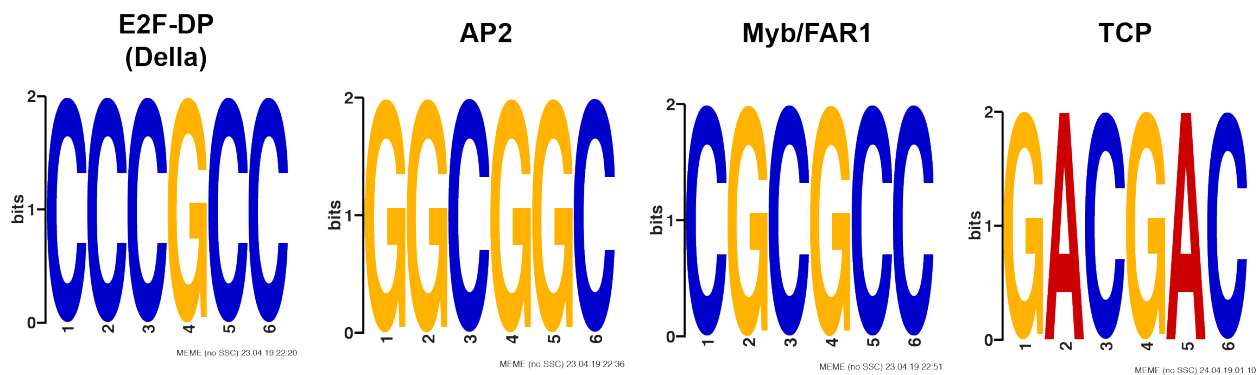

675  
676

677

## Supplemental Figure 6

Vegetative Stage    Reproductive Stage

Developmental progress

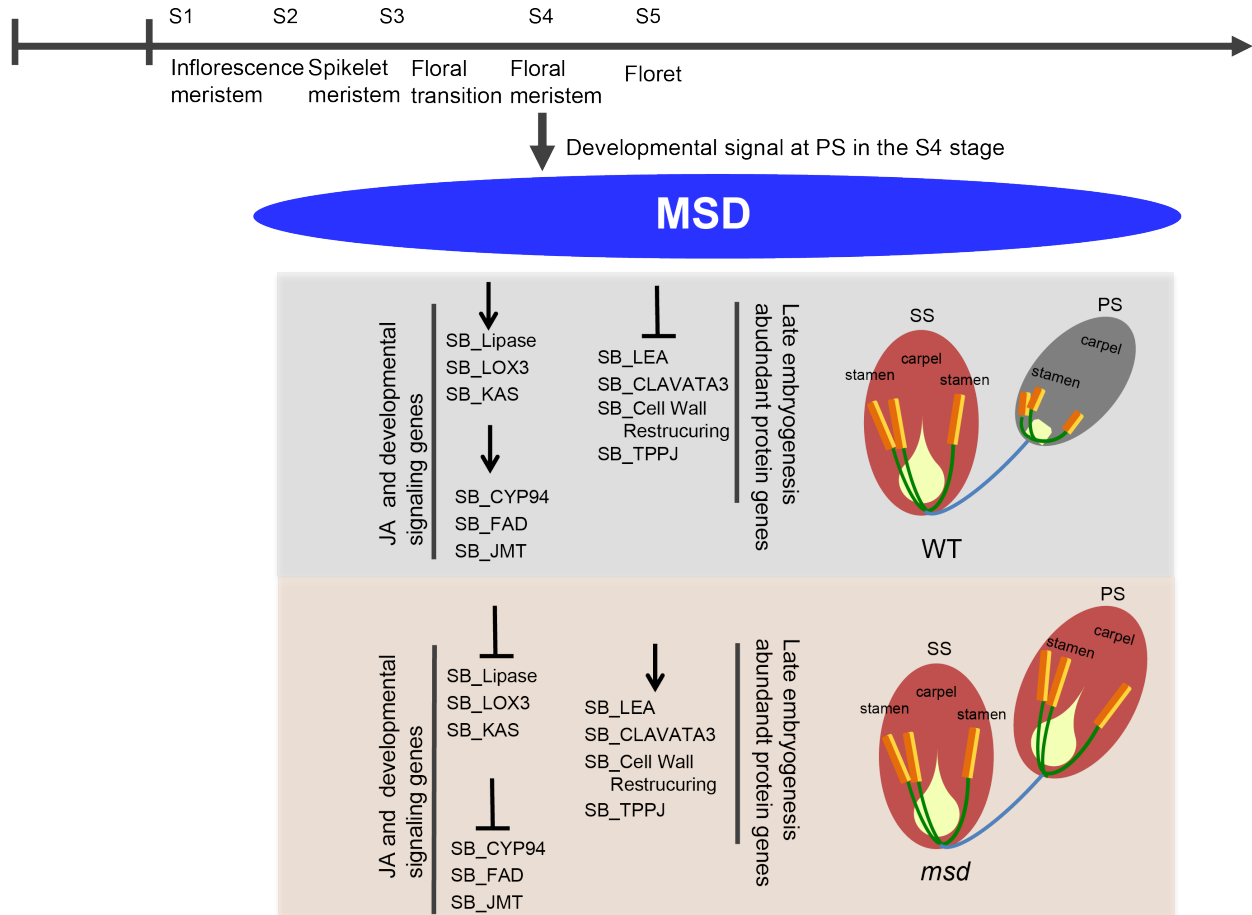

678
